# Supplementary material for: Transcriptome Profiling of Dysregulated GPCRs Reveals Overlapping Patterns across Psychiatric Disorders and Age-Disease Interactions
Source: MDPI journal article supplement (doi:10.3390/cells10112967), 2021-10-31
Supplement: s1 [file s1]

| Ligand                                  |                         |                                                                                      |
|-----------------------------------------|-------------------------|--------------------------------------------------------------------------------------|
| Biogenic Amines                         | Disorder                | Receptors                                                                            |
| Serotonin (5-HT)                        | ASD<br>SCZ<br>BP<br>MDD | HTR1D<br>HTR1B HTR1D HTR1E HTR1F HTR2B HTR5A HTR6<br>HTR2B HTR7 HTR5A HTR1D<br>HTR1B |
| Noradrenaline (NA)                      | ASD<br>SCZ<br>MDD       | ADRA1D<br>ADRA1B ADRA1D ADRA2A ADRA2B<br>ADRA1B ADRB3                                |
| Acetylcholine (Ach)                     | ASD<br>SCZ<br>BP        | CHRM5<br>CHRM2 CHRM4<br>CHRM3                                                        |
| Histamine (His)                         | SCZ<br>BP<br>MDD        | HRH2 HRH3<br>HRH3<br>HRH1 HRH2 HRH4                                                  |
| Dopamine (DA)                           | SCZ                     | DRD2 DRD4 DRD5                                                                       |
| Trace amines (TA)                       | MDD                     | TAAR5 TAAR8                                                                          |
| Amino Acids/Dicarboxylic acids          | Disorder                | Receptors                                                                            |
| Glutamate                               | ASD<br>SCZ<br>BP<br>MDD | GRM1 GRM8<br>GRM1 GRM2 GRM3 GRM5<br>GRM1 GRM5<br>GRM6 GRM7                           |
| Succinate                               | SCZ<br>BP               | SUCNR1<br>SUCNR1                                                                     |
| GABA                                    | MDD                     | GABBR1                                                                               |
| Hormones                                | Disorder                | Receptors                                                                            |
| Gonadotropin Releasing Hormone (GNRH)   | ASD<br>SCZ<br>BP<br>MDD | GNRHR2<br>GNRHR<br>GNRHR2<br>GNRHR GNRHR2                                            |
| Parathyroid hormone                     | ASD<br>SCZ<br>BP        | PTH2R<br>PTH2R<br>PTH2R                                                              |
| Thyroid stimulating hormone (TSH)       | SCZ<br>BP               | TSHR<br>TSHR                                                                         |
| Follicle Stimulating Hormone (FSH)      | BP<br>MDD               | FSHR<br>FSHR                                                                         |
| Growth hormone releasing hormone (GHRH) | ASD<br>MDD              | GHRHR<br>GHRHR                                                                       |
| Prolactin Releasing Hormone             | SCZ                     | PRLHR                                                                                |
| Ghrelin                                 | MDD                     | GHSR                                                                                 |
| Lipids                                  | Disorder                | Receptors                                                                            |
| Prostaglandin                           | ASD<br>SCZ<br>BP<br>MDD | PTGDR2 PTGER3<br>PTGDR2 PTGDR PTGER1 PTGIR<br>PTGDR2 PTGER1 PTGER4<br>PTGDR2         |
| Sphingosine-1-Phosphate                 | ASD<br>SCZ<br>BP        | S1PR1<br>S1PR3<br>S1PR3                                                              |
| Cysteinyl Leukotriene                   | SCZ<br>BP<br>MDD        | CYSLTR1<br>CYSLTR1<br>CYSLTR2                                                        |
| lysophosphatidic acid                   | SCZ<br>BP               | LPAR1 LPAR3 LPAR5 LPAR6<br>LPAR3 LTB4R LPAR5 LPAR6                                   |

|                                                   |                         |                                                   |
|---------------------------------------------------|-------------------------|---------------------------------------------------|
|                                                   | MDD                     | LPAR2 LPAR5 LPAR6                                 |
| Oxoecosanoid                                      | BP                      | OXER1                                             |
| cannabinoids                                      | MDD                     | CNR2                                              |
| <b>Peptides</b>                                   | <b>Disorder</b>         | <b>Receptors</b>                                  |
| Melanocortin                                      | ASD<br>SCZ<br>BP<br>MDD | MC1R<br>MC4R<br>MC1R MC4R<br>MC2R MC5R            |
| Orexin                                            | ASD<br>SCZ<br>BP<br>MDD | HCRTR1 HCRTR2<br>HCRTR1 HCRTR2<br>HCRTR1<br>HCAR2 |
| Formyl Peptide                                    | ASD<br>SCZ<br>BP<br>MDD | FPR1 FPR2<br>FPR1 FPR2<br>FPR1<br>FPR2            |
| Calcitonin gene-related peptide (CGRP)            | ASD<br>SCZ<br>BP        | CALCRL<br>CALCRL<br>CALCRL                        |
| Angiotensin-(1-7)                                 | ASD<br>SCZ<br>MDD       | MAS1<br>MAS1<br>MAS1                              |
| Neuropeptide Y                                    | ASD<br>SCZ<br>MDD       | NPY1R<br>NPY1R<br>NPY1R NPY6R                     |
| Neuromedin B                                      | ASD<br>SCZ              | NMBR<br>NMBR                                      |
| Oxytocin                                          | ASD<br>SCZ              | OXTR<br>OXTR                                      |
| Neurotensin                                       | ASD<br>SCZ              | NTSR1 NTSR2<br>NTSR2                              |
| Somatostatin                                      | ASD<br>SCZ              | SSTR1<br>SSTR2 SSTR4                              |
| Apelin                                            | ASD<br>SCZ              | APLNR<br>APLNR                                    |
| Adenylate cyclase activating polypeptide (ADCYAP) | ASD<br>SCZ              | ADCYAP1R1<br>ADCYAP1R1                            |
| platelet Activating Factor                        | SCZ<br>BP               | PTAFR<br>PTAFR                                    |
| Neuropeptide FF                                   | SCZ<br>BP               | NPFFR1<br>NPFFR1                                  |
| Neuropeptides B And W                             | SCZ<br>BP               | NPBWR1 NPBWR2<br>NPBWR1                           |
| Galanin                                           | SCZ<br>MDD              | GALR1<br>GALR3                                    |
| Neuromedin U                                      | SCZ<br>MDD              | NMUR2<br>NMUR2                                    |
| Relaxin                                           | SCZ<br>MDD              | RXFP1<br>RXFP3                                    |
| Endorphin                                         | SCZ<br>MDD              | OPRK1 OPRM1<br>OPRM1                              |
| Vasopressin                                       | BP<br>MDD               | AVPR2<br>AVPR1B                                   |
| Glucagon Like Peptide                             | ASD                     | GLP2R                                             |
| tachykinin                                        | ASD                     | TACR3                                             |

|                                       |                         |                                                                                            |
|---------------------------------------|-------------------------|--------------------------------------------------------------------------------------------|
|                                       | SCZ<br>MDD              | TACR3<br>TACR3                                                                             |
| Endothelin                            | ASD                     | EDNRB                                                                                      |
| Bradykinin                            | SCZ                     | BDKRB2                                                                                     |
| Melanin concentrating hormone (MCH)   | SCZ                     | MCHR1                                                                                      |
| Vasoactive intestinal peptide (VIP)   | SCZ                     | VIPR1                                                                                      |
| Kisspeptin                            | SCZ                     | KISS1R                                                                                     |
| Pyroglutamylated RFamide Peptide      | SCZ                     | QRFR                                                                                       |
| Nociceptin/Orphanin QR                | BP                      | OPRL1                                                                                      |
| Gastrin releasing peptide (GRH)       | MDD                     | GRPR                                                                                       |
| Bile acid                             | MDD                     | GPBAR1                                                                                     |
| Corticotropin releasing hormone (CRH) | MDD                     | CRHR1                                                                                      |
| <b>Protein</b>                        | <b>Disorder</b>         | <b>Receptors</b>                                                                           |
| Wnt                                   | ASD<br>SCZ<br>BP<br>MDD | FZD1 LGR5 LGR4 SMO<br>FZD1 FZD4 FZD5 FZD7 FZD9 LGR4 LGR5 LGR6 SMO<br>LGR6 FZD4 FZD5<br>SMO |
| Proteases                             | ASD<br>SCZ<br>MDD       | F2R<br>F2R<br>F2R                                                                          |
| Proteases                             | SCZ<br>BP<br>MDD        | F2RL1<br>F2RL1<br>F2RL1                                                                    |
| <b>Purine</b>                         | <b>Names</b>            | <b>Receptors</b>                                                                           |
| Adenosine                             | ASD<br>SCZ<br>MDD       | ADORA1 ADORA2B<br>ADORA1 ADORA2B<br>ADORA1                                                 |
| ATP/ADP                               | SCZ<br>BP<br>MDD        | P2RY12 P2RY13 P2RY2<br>P2RY12 P2RY13<br>P2RY13 P2RY2                                       |
| <b>Photon</b>                         | <b>Disorder</b>         | <b>Receptors</b>                                                                           |
| Photon                                | ASD<br>SCZ<br>BP<br>MDD | OPN3<br>RHO<br>OPN4<br>OPN5                                                                |
| <b>Adhesion</b>                       | <b>Disorder</b>         | <b>Receptors</b>                                                                           |
| Unknown                               | ASD<br>SCZ<br>BP        | CELSR2 CELSR1<br>CELSR1 CELSR2<br>CELSR1                                                   |
